# Supplementary material
Source: PubMed Central journal article supplement (PMC2886694)
Supplement: supp_01295.2009_suppdata.pdf [file supp_01295.2009_suppdata.pdf]

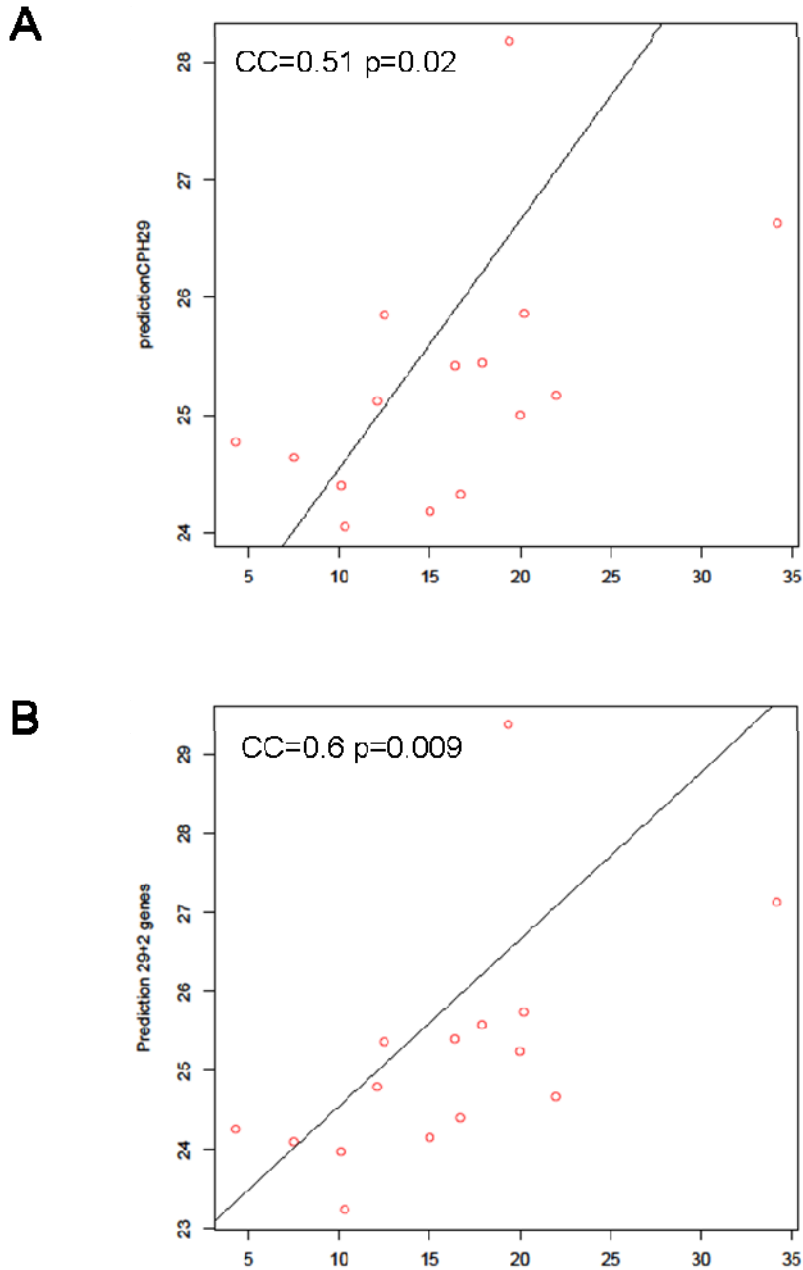

**Figure S1.** (a) Independent test of predictor gene set from study 1 applied to study 2 (young active subjects that underwent 12 wks intense interval based aerobic training. N=17, CC=0.51,  $p=0.02$ ) Correlation was between predicted and observed response to exercise in terms of percent change in  $\dot{V}O_2\text{max}$  (l/min). (b) The genes identified by QTL genotyping in 473 subjects (SVIL, TTN, NRP2 and MIPEP) 3 of which demonstrated a significant correlation with oxidative capacity changes following exercise, we used in the blind validation data set (Figure S2a). Addition of SVIL and NRP2 was found to improve the performance of the classifier (CC=0.64,  $p=0.009$ ) while MIPEP did not alter this improved performance further.

Enlarged version of figure 3b

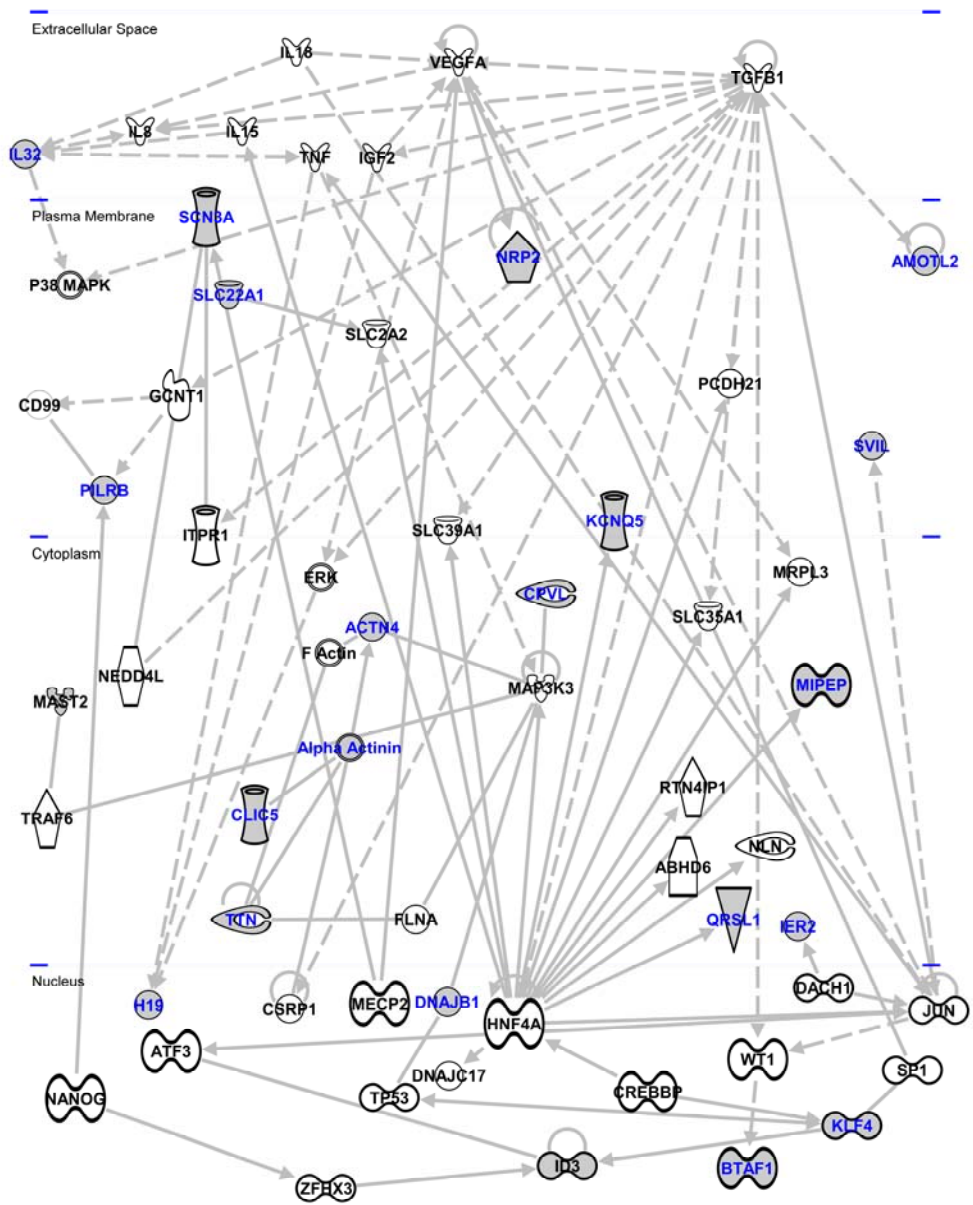

Enlarged version of figure 3c

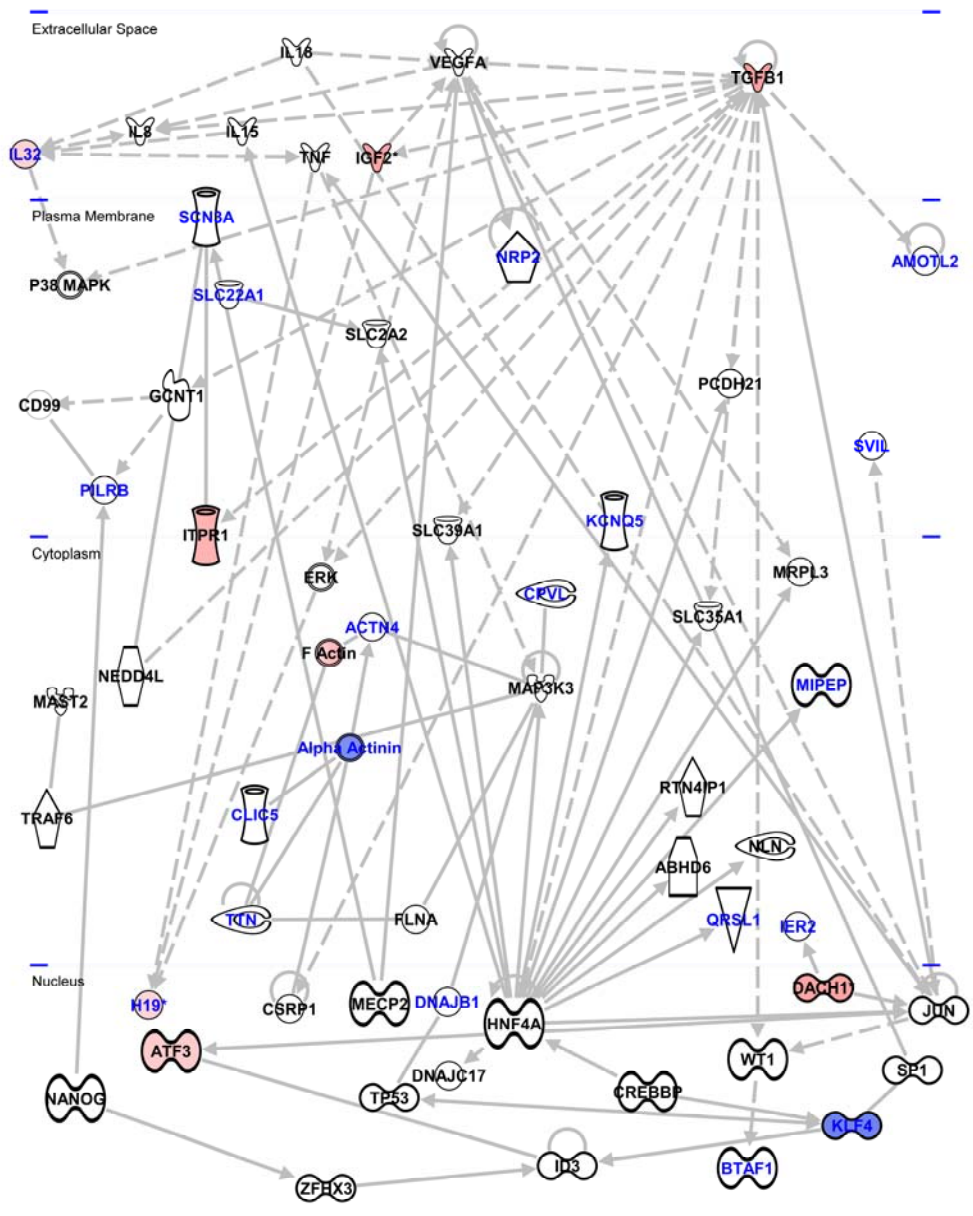

**Table S1 Group 1 subject characteristics**

|                                           | Pre-training (mean±sem) |
|-------------------------------------------|-------------------------|
| Body Mass (kg)                            | 78.6±2.7                |
| Age (y)                                   | 23±1                    |
| Height (m)                                | 1.82±0.02               |
| $\dot{V}O_{2\max}$ (L·min <sup>-1</sup> ) | 3.71 ± 0.55             |

Values are mean (SE)

**Table S2 Group 2 subject characteristics**

|                                           | Pre-training (mean±SD) |
|-------------------------------------------|------------------------|
| Age (y)                                   | 29±6                   |
| Body Mass (kg)                            | 81.8±9.0               |
| Height (m)                                | 1.8±0.5                |
| $\dot{V}O_{2\max}$ (L·min <sup>-1</sup> ) | 4.1±0.5                |

Values are mean (SE)

**Table S3. Baseline characteristics of the HERITAGE Family Study subjects.**

|                                | All         | Men         | Women       |
|--------------------------------|-------------|-------------|-------------|
| N                              | 473         | 230         | 243         |
| Age, years                     | 35.7 (14.5) | 36.7 (15.0) | 34.8 (14.0) |
| BMI, kg/m <sup>2</sup>         | 25.8 (4.9)  | 26.6 (4.9)  | 24.9 (4.8)  |
| VO <sub>2</sub> max, L/min     | 2.46 (0.7)  | 2.03 (0.6)  | 1.91 (0.4)  |
| VO <sub>2</sub> max, ml/kg/min | 33.2 (8.8)  | 37.0 (9.0)  | 29.5 (6.9)  |

Values are mean (SD)

**Table S4. SNPs set used in stepwise regression models described above. SNPs (n=35) showing strongest association with rdVO2mx from ALL genes were selected.**

HERITAGE genes and SNPs chosen for regression models (n=10).

| GENE   | SNP        | CHR | MAP         |
|--------|------------|-----|-------------|
| SLC4A5 | rs828902   | 2   | 74,323,642  |
| TTN    | rs10497520 | 2   | 179,353,100 |
| NRP2   | rs3770991  | 2   | 206,363,984 |
| CREB1  | rs2709356  | 2   | 208,120,337 |
| PPARD  | s2076167   | 6   | 35,499,765  |
| SVIL   | rs6481619  | 10  | 30,022,960  |
| KIF5B  | rs806819   | 10  | 32,403,990  |
| ACTN3  | s1815739   | 11  | 66,084,671  |
| MIPEP  | rs7324557  | 13  | 23,194,862  |
| ACE    | DI         | 17  | 58,919,622  |

Molecular predictor genes and SNPs chosen for regression models (n=25).

| GENE          | SNP        | CHR | MAP         |
|---------------|------------|-----|-------------|
| ID3           | rs11574    | 1   | 23,758,085  |
| MAST2         | rs2236560  | 1   | 46,268,021  |
| SYPL2         | rs12049330 | 1   | 109,832,711 |
| SCN3A         | rs7574918  | 2   | 165,647,425 |
| AMOTL2        | rs13322269 | 3   | 135,569,834 |
| BTNL9         | rs888949   | 5   | 180,425,011 |
| KCNQ5         | rs10943075 | 6   | 73,776,703  |
| RTN4IP1/QRSL1 | rs898896   | 6   | 107,169,855 |
| SLC22A3       | rs2457571  | 6   | 160,754,818 |
| CPVL          | rs4257918  | 7   | 29,020,374  |
| PILRB         | rs13228694 | 7   | 99,778,243  |
| DEPDC6        | rs7386139  | 8   | 121,096,600 |
| KLF4          | rs4631527  | 9   | 109,309,857 |
| TET1          | rs12413410 | 10  | 70,055,236  |
| BTAFL1        | rs2792022  | 10  | 93,730,409  |
| H19           | rs2251375  | 11  | 1,976,072   |
| METTL3        | rs1263809  | 14  | 21,058,740  |
| DIS3L         | rs1546570  | 15  | 64,382,829  |
| UNKL          | rs3751894  | 16  | 1,426,876   |
| IL32          | rs13335800 | 16  | 3,052,198   |
| SMTNL2        | rs7217556  | 17  | 4,425,585   |
| ZSWIM7        | rs10491104 | 17  | 15,825,286  |
| ENOSF1        | rs3786355  | 18  | 671,962     |
| IER2          | rs892020   | 19  | 13,128,185  |
| DNAJB1        | rs4926222  | 19  | 14,488,050  |
